# Supplementary material
Source: publisher figshare collection journal article supplement (https://tandf.figshare.com/ndownloader/files/22137393)
Supplement: Supplementary file 1 [file 22137393]

**Supplementary material for Hosono et al., “A case of childhood glaucoma with a combined partial monosomy 6p25 and partial trisomy 18p11 due to an unbalanced translocation” *Ophthalmic Genetics*, 2020.**

**Supplementary Table S1.** Summary of clinical features in patients with 6p25 deletions.

|                                                 | Our patient    | Frequency of previous cases <sup>a</sup> |
|-------------------------------------------------|----------------|------------------------------------------|
| <b>Structural eye abnormality</b>               |                |                                          |
| Posterior embryotoxon                           | +              | 72.7% (8/11)                             |
| Iris hypoplasia                                 | +              | 70.0% (7/10)                             |
| Glaucoma                                        | +              | 40.0% (4/10)                             |
| Refractive error                                | -              | 84.6% (11/13)                            |
| Strabismus                                      | +              | 81.3% (13/16)                            |
| Corectopia                                      | +              | 75.0% (6/8)                              |
| Other anterior eye chamber anomaly <sup>b</sup> | +              | 84.2% (16/19)                            |
| <b>Craniofacial features</b>                    |                |                                          |
| Frontal bossing/high forehead                   | +              | 100% (13/13)                             |
| Midface retrusion/flat midface                  | +              | 100% (8/8)                               |
| Downslanted palpebral fissures                  | -              | 77.8% (14/18)                            |
| Hypertelorism/telecanthus                       | -              | 95.8% (23/24)                            |
| External ear anomalies/low-set                  | +              | 82.4% (14/17)                            |
| Wide/depressed nasal bridge                     | +              | 100% (15/15)                             |
| Short philtrum                                  | -              | 50.0% (4/8)                              |
| Smooth/flat philtrum                            | +              | 100% (4/4)                               |
| High/cleft palate                               | - <sup>c</sup> | 66.7% (10/15)                            |
| <b>Cognitive and physical development</b>       |                |                                          |
| Development delay                               | +              | 100% (24/24)                             |
| Intellectual disability                         | +              | 85.7% (12/14)                            |
| Language impairment                             | +              | 94.7% (18/19)                            |
| Hypotonia                                       | +              | 76.9% (10/13)                            |
| Hearing loss                                    | + <sup>d</sup> | 78.3% (18/23)                            |
| Heart defect                                    | +              | 55.6% (10/18)                            |

|                                    |                |               |  |
|------------------------------------|----------------|---------------|--|
| Brain abnormalities                |                |               |  |
| Dandy-Walker malformation          | -              | 62.5% (5/8)   |  |
| Hydrocephalus/Abnormal skull shape | -              | 84.6% (11/13) |  |
| White matter abnormalities         | +              | 85.7% (6/7)   |  |
| Musculoskeletal anomalies          |                |               |  |
| Epiphyseal dysplasia               | - <sup>e</sup> | 100% (5/5)    |  |
| Hip dysplasia                      | - <sup>e</sup> | 100% (3/3)    |  |
| Hand anomaly                       | +              | 91.7% (11/12) |  |
| Foot anomaly                       | -              | 88.9% (16/18) |  |
| Dental abnormalities               | U              | 69.2% (9/13)  |  |
| Hernia (umbilical or inguinal)     | -              | 30% (3/10)    |  |

<sup>a</sup>Linhares ND et al (17).

<sup>b</sup>Other anterior eye chamber anomaly: Goniodysgenesis, Axenfeld-Rieger anomaly, Axenfeld-Rieger Syndrome, coloboma, corneal opacity, cataract, iridocorneal synechiae, Duane retraction syndrome, exophthalmos, enophthalmos, iridocorneal adhesions, microphthalmia.

<sup>c</sup>There is no cleft palate, but the high palate is unknown.

<sup>d</sup>Deafness was assessed by an auditory brainstem response test.

<sup>e</sup>No abnormalities in orthopedic assessment.

+, present; -, absent; U, unknown

**Supplementary Table S2.** Detailed description of genes included in the 6p25 deletion and 18p11 duplication regions.

| Gene            | Accession no.  | Cytogenetic location | Position             | Strand | Description                                    |
|-----------------|----------------|----------------------|----------------------|--------|------------------------------------------------|
| <i>DUSP22</i>   | NM_001286555.1 | 6p25.3               | chr6:292057-351355   | +      | Dual specificity phosphatase 22                |
| <i>IRF4</i>     | NM_002460.3    | 6p25.3               | chr6:391739-411443   | +      | Interferon regulatory factor 4                 |
| <i>EXOC2</i>    | NM_018303.5    | 6p25.3               | chr6:485138-693141   | -      | Exocyst complex component 2                    |
| <i>HUS1B</i>    | NM_148959.3    | 6p25.3               | chr6:655939-656964   | -      | HUS1 checkpoint clamp component B              |
| <i>FOXQ1</i>    | NM_033260.3    | 6p25.3               | chr6:1312675-1314993 | +      | Forkhead box Q1                                |
| <i>FOXF2</i>    | NM_001452.1    | 6p25.3               | chr6:1390069-1395832 | +      | Forkhead box F2                                |
| <i>FOXC1</i>    | NM_001453.2    | 6p25.3               | chr6:1610681-1614132 | +      | Forkhead box C1                                |
| <i>GMDS</i>     | NM_001500.3    | 6p25.3               | chr6:1624035-2245868 | -      | GDP-mannose 4,6-dehydratase                    |
| <i>MYLK4</i>    | NM_001012418.4 | 6p25.2               | chr6:2663863-2751200 | -      | Myosin light chain kinase family member 4      |
| <i>WRNIP1</i>   | NM_020135.2    | 6p25.2               | chr6:2765666-2785979 | +      | Werner helicase interacting protein 1          |
| <i>SERPINB1</i> | NM_030666.3    | 6p25.2               | chr6:2832566-2842283 | -      | Serpin family B member 1                       |
| <i>SERPINB9</i> | NM_004155.5    | 6p25.2               | chr6:2887499-2903546 | -      | Serpin family B member 9                       |
| <i>SERPINB6</i> | NM_004568.5    | 6p25.2               | chr6:2948393-2972399 | -      | Serpin family B member 6                       |
| <i>NQO2</i>     | NM_000904.4    | 6p25.2               | chr6:3000050-3020110 | +      | NAD(P)H quinone dehydrogenase 2                |
| <i>RIPK1</i>    | NM_003804.4    | 6p25.2               | chr6:3064122-3115421 | +      | Receptor interacting serine/threonine kinase 1 |
| <i>BPHL</i>     | NM_004332.3    | 6p25.2               | chr6:3118610-3153432 | +      | Biphenyl hydrolase like                        |
| <i>TUBB2A</i>   | NM_001069.2    | 6p25.2               | chr6:3153900-3157783 | -      | Tubulin beta 2A class IIa                      |
| <i>TUBB2B</i>   | NM_178012.4    | 6p25.2               | chr6:3224495-3227968 | -      | Tubulin beta 2A class IIb                      |
| <i>PSMG4</i>    | NM_001128591.1 | 6p25.2               | chr6:3259162-3268300 | +      | Proteasome assembly chaperone 4                |

|                 |                |          |                       |   |                                                                          |
|-----------------|----------------|----------|-----------------------|---|--------------------------------------------------------------------------|
| <i>SLC22A23</i> | NM_015482.1    | 6p25.2   | chr6:3269207-3456793  | - | Solute carrier family 22 member 23                                       |
| <i>PXDC1</i>    | NM_183373.3    | 6p25.2   | chr6:3722836-3752246  | - | PX domain containing 1                                                   |
| <i>FAM50B</i>   | NM_012135.2    | 6p25.2   | chr6:3849600-3851554  | + | Family with sequence similarity 50 member B                              |
| <i>PRPF4B</i>   | NM_003913.4    | 6p25.2   | chr6:4021569-4065217  | + | Pre-mRNA processing factor 4B                                            |
| <i>FAM217A</i>  | NM_173563.2    | 6p25.2   | chr6:4068593-4079457  | - | Family with sequence similarity 217 member A                             |
| <i>C6orf201</i> | NM_001085401.2 | 6p25.2   | chr6:4079440-4130999  | + | Chromosome 6 open reading frame 201                                      |
| <i>ECI2</i>     | NM_206836.2    | 6p25.2   | chr6:4115927-4135831  | - | Enoyl-CoA delta isomerase 2                                              |
| <i>CDYL</i>     | NM_004824.3    | 6p25.1   | chr6:4776680-4955778  | + | Chromodomain Y-like                                                      |
|                 |                |          |                       |   |                                                                          |
| <i>USP14</i>    | NM_005151.3    | 18p11.32 | chr18:158483-213739   | + | Ubiquitin specific peptidase 14                                          |
| <i>THOC1</i>    | NM_005131.2    | 18p11.32 | chr18:214520-268059   | - | THO complex 1                                                            |
| <i>COLEC12</i>  | NM_130386.2    | 18p11.32 | chr18:319355-500729   | - | Collectin subfamily member 12                                            |
| <i>CETN1</i>    | NM_004066.2    | 18p11.32 | chr18:580343-582020   | + | Centrin 1                                                                |
| <i>CLUL1</i>    | NM_014410.4    | 18p11.32 | chr18:596998-650298   | + | Clusterin like 1                                                         |
| <i>TYMSOS</i>   | NM_001012716.2 | 18p11.32 | chr18:649620-658340   | - | TYMS opposite strand                                                     |
| <i>TYMS</i>     | NM_001071.2    | 18p11.32 | chr18:657604-673499   | + | Thymidylate synthetase                                                   |
| <i>ENOSF1</i>   | NM_202758.3    | 18p11.32 | chr18:670324-712517   | - | Enolase superfamily member 1                                             |
| <i>YES1</i>     | NM_005433.3    | 18p11.32 | chr18:721592-812327   | - | YES proto-oncogene 1, Src family tyrosine kinase                         |
| <i>ADCYAP1</i>  | NM_001099733.1 | 18p11.32 | chr18:904944-912173   | + | Adenylate cyclase activating polypeptide 1                               |
| <i>METTL4</i>   | NM_022840.4    | 18p11.32 | chr18:2537524-2571502 | - | Methyltransferase like 4                                                 |
| <i>NDC80</i>    | NM_006101.3    | 18p11.32 | chr18:2571556-2616634 | + | NDC80 kinetochore complex component                                      |
| <i>SMCHD1</i>   | NM_015295.2    | 18p11.32 | chr18:2655886-2805015 | + | Structural maintenance of chromosomes flexible hinge domain containing 1 |

|                 |                |                        |                       |   |                                                |
|-----------------|----------------|------------------------|-----------------------|---|------------------------------------------------|
| <i>EMILIN2</i>  | NM_032048.2    | 18p11.32 -<br>18p11.31 | chr18:2847004-2916001 | + | Elastin microfibril interfacer 2               |
| <i>LPIN2</i>    | NM_014646.2    | 18p11.31               | chr18:2916992-3011945 | - | Lipin 2                                        |
| <i>MYOM1</i>    | NM_003803.3    | 18p11.31               | chr18:3066805-3220106 | - | Myomesin 1                                     |
| <i>MYL12A</i>   | NM_006471.3    | 18p11.31               | chr18:3247528-3256235 | + | Myosin light chain 12A                         |
| <i>MYL12B</i>   | NM_001144945.1 | 18p11.31               | chr18:3262717-3278282 | + | Myosin light chain 12B                         |
| <i>TGIF1</i>    | NM_173208.2    | 18p11.31               | chr18:3449649-3458409 | + | TGFB induced factor homeobox 1                 |
| <i>DLGAP1</i>   | NM_004746.3    | 18p11.31               | chr18:3496030-4455266 | - | DLG associated protein 1                       |
| <i>AKAIN1</i>   | NM_001145194.1 | 18p11.31               | chr18:5143672-5197255 | - | A-kinase anchor inhibitor 1                    |
| <i>ZBTB14</i>   | NM_001143823.2 | 18p11.31               | chr18:5289018-5296194 | - | Zinc finger and BTB domain containing 14       |
| <i>EPB41L3</i>  | NM_012307.3    | 18p11.31               | chr18:5392380-5544309 | - | Erythrocyte membrane protein band 4.1 like 3   |
| <i>TMEM200C</i> | NM_001080209.1 | 18p11.31               | chr18:5890184-5892103 | - | Transmembrane protein 200C                     |
| <i>L3MBTL4</i>  | NM_173464.3    | 18p11.31               | chr18:5954705-6414910 | - | L3MBTL histone methyl-lysine binding protein 4 |
| <i>ARHGAP28</i> | NM_001010000.2 | 18p11.31               | chr18:6834432-6915715 | + | Rho GTPase activating protein 28               |
| <i>LAMA1</i>    | NM_005559.3    | 18p11.31               | chr18:6941743-7117813 | - | Laminin subunit alpha 1                        |
| <i>LRRC30</i>   | NM_001105581.1 | 18p11.23               | chr18:7231137-7232042 | + | Leucine rich repeat containing 30              |
| <i>PTPRM</i>    | NM_001105244.1 | 18p11.23               | chr18:7567314-8406859 | + | Protein tyrosine phosphatase, receptor type M  |
| <i>RAB12</i>    | NM_001025300.2 | 18p11.22               | chr18:8609443-8639380 | + | RAB12, member RAS oncogene family              |
| <i>MTCL1</i>    | NM_015210.3    | 18p11.22               | chr18:8717369-8832775 | + | Microtubule crosslinking factor 1              |
| <i>NDUFV2</i>   | NM_021074.4    | 18p11.22               | chr18:9102628-9134343 | + | NADH:ubiquinone oxidoreductase core subunit V2 |

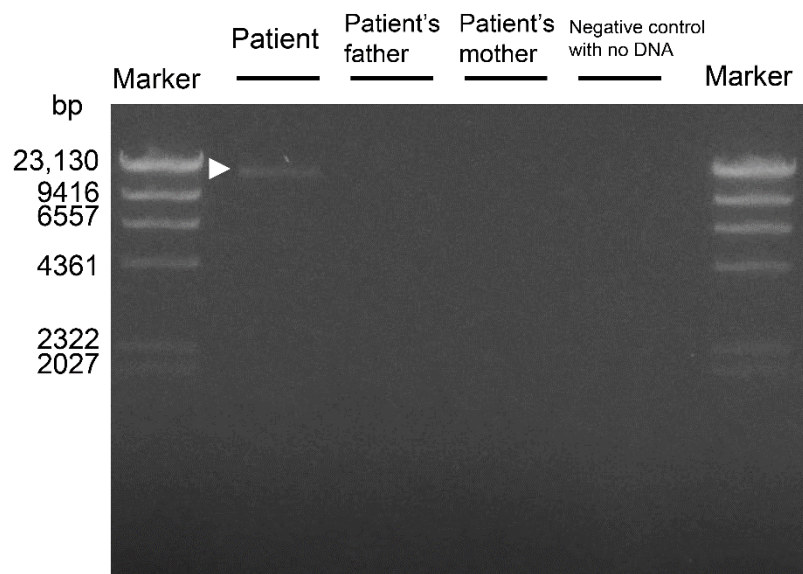

**Supplementary Figure S1.** Results of long-range PCR analysis.

Long-range PCR was performed to amplify junction fragments containing the translocation breakpoints. We successfully amplified approximately 20-kbp of the product (indicated by arrow) using the specially designed primer pair (see text). The amplification conditions were as follows: PCR was performed using the Tks Gflex DNA Polymerase kit (Takara, Shiga, Japan) for 30 cycles at 98°C for 10s, 60°C for 30s, and 68°C for 10 min in an automated thermal cycler.
